# Supplementary material for: A Systematic Review of the Effectiveness of Brief Health Behaviour Change Interventions on Service Users Accessing the Third and Social Economy Sector
Source: Hindawi journal article supplement (doi:10.1155/2023/2928228), 2023-09-20
Supplement: f1 [file 2928228.f1.docx]

**Supplementary Material**

**S1: PRISMA checklist**

| **Section and Topic** | **Item #** | **Checklist item** | **Location where item is reported** |
| --- | --- | --- | --- |
| **TITLE** | | |  |
| Title | 1 | Identify the report as a systematic review. | P1 L1 |
| **ABSTRACT** | | |  |
| Abstract | 2 | See the PRISMA 2020 for Abstracts checklist. | See abstract checklist (below) |
| **INTRODUCTION** | | |  |
| Rationale | 3 | Describe the rationale for the review in the context of existing knowledge. | P3 L63-75  P4 L89-94 |
| Objectives | 4 | Provide an explicit statement of the objective(s) or question(s) the review addresses. | P4 L96-98 |
| **METHODS** | | |  |
| Eligibility criteria | 5 | Specify the inclusion and exclusion criteria for the review and how studies were grouped for the syntheses. | P5+6 L106-133 |
| Information sources | 6 | Specify all databases, registers, websites, organisations, reference lists and other sources searched or consulted to identify studies. Specify the date when each source was last searched or consulted. | P6 L135-140 |
| Search strategy | 7 | Present the full search strategies for all databases, registers and websites, including any filters and limits used. | P7 Table 1 |
| Selection process | 8 | Specify the methods used to decide whether a study met the inclusion criteria of the review, including how many reviewers screened each record and each report retrieved, whether they worked independently, and if applicable, details of automation tools used in the process. | P7+8 L160-166 |
| Data collection process | 9 | Specify the methods used to collect data from reports, including how many reviewers collected data from each report, whether they worked independently, any processes for obtaining or confirming data from study investigators, and if applicable, details of automation tools used in the process. | P8 L174-179 |
| Data items | 10a | List and define all outcomes for which data were sought. Specify whether all results that were compatible with each outcome domain in each study were sought (e.g. for all measures, time points, analyses), and if not, the methods used to decide which results to collect. | P8 L175 |
| 10b | List and define all other variables for which data were sought (e.g. participant and intervention characteristics, funding sources). Describe any assumptions made about any missing or unclear information. | P8 L175 |
| Study risk of bias assessment | 11 | Specify the methods used to assess risk of bias in the included studies, including details of the tool(s) used, how many reviewers assessed each study and whether they worked independently, and if applicable, details of automation tools used in the process. | P8 L168-172 |
| Effect measures | 12 | Specify for each outcome the effect measure(s) (e.g. risk ratio, mean difference) used in the synthesis or presentation of results. | P8 L175 |
| Synthesis methods | 13a | Describe the processes used to decide which studies were eligible for each synthesis (e.g. tabulating the study intervention characteristics and comparing against the planned groups for each synthesis (item #5)). | P8 L176-179 |
| 13b | Describe any methods required to prepare the data for presentation or synthesis, such as handling of missing summary statistics, or data conversions. | N/A |
| 13c | Describe any methods used to tabulate or visually display results of individual studies and syntheses. | N/A |
| 13d | Describe any methods used to synthesize results and provide a rationale for the choice(s). If meta-analysis was performed, describe the model(s), method(s) to identify the presence and extent of statistical heterogeneity, and software package(s) used. | P8 L177-179 |
| 13e | Describe any methods used to explore possible causes of heterogeneity among study results (e.g. subgroup analysis, meta-regression). | P8 176-177 |
| 13f | Describe any sensitivity analyses conducted to assess robustness of the synthesized results. | N/A |
| Reporting bias assessment | 14 | Describe any methods used to assess risk of bias due to missing results in a synthesis (arising from reporting biases). | N/A |
| Certainty assessment | 15 | Describe any methods used to assess certainty (or confidence) in the body of evidence for an outcome. | N/A |
| **RESULTS** | | |  |
| Study selection | 16a | Describe the results of the search and selection process, from the number of records identified in the search to the number of studies included in the review, ideally using a flow diagram. | Figure 1 |
| 16b | Cite studies that might appear to meet the inclusion criteria, but which were excluded, and explain why they were excluded. | P8+9 L187-191 |
| Study characteristics | 17 | Cite each included study and present its characteristics. | P11-17 Table 2 |
| Risk of bias in studies | 18 | Present assessments of risk of bias for each included study. | P18 L239-245  Figure 2+3 |
| Results of individual studies | 19 | For all outcomes, present, for each study: (a) summary statistics for each group (where appropriate) and (b) an effect estimate and its precision (e.g. confidence/credible interval), ideally using structured tables or plots. | P11-17 Table 2 |
| Results of syntheses | 20a | For each synthesis, briefly summarise the characteristics and risk of bias among contributing studies. | N/A |
| 20b | Present results of all statistical syntheses conducted. If meta-analysis was done, present for each the summary estimate and its precision (e.g. confidence/credible interval) and measures of statistical heterogeneity. If comparing groups, describe the direction of the effect. | N/A |
| 20c | Present results of all investigations of possible causes of heterogeneity among study results. | N/A |
| 20d | Present results of all sensitivity analyses conducted to assess the robustness of the synthesized results. | N/A |
| Reporting biases | 21 | Present assessments of risk of bias due to missing results (arising from reporting biases) for each synthesis assessed. | N/A |
| Certainty of evidence | 22 | Present assessments of certainty (or confidence) in the body of evidence for each outcome assessed. | N/A |
| **DISCUSSION** | | |  |
| Discussion | 23a | Provide a general interpretation of the results in the context of other evidence. | P27-30 L340-422 |
| 23b | Discuss any limitations of the evidence included in the review. | P30 L425-428 |
| 23c | Discuss any limitations of the review processes used. | P30+31 L428-436 |
| 23d | Discuss implications of the results for practice, policy, and future research. | P31 L438-443 |
| **OTHER INFORMATION** | | |  |
| Registration and protocol | 24a | Provide registration information for the review, including register name and registration number, or state that the review was not registered. | P4 L100-102 |
| 24b | Indicate where the review protocol can be accessed, or state that a protocol was not prepared. | P4 L100-102 |
| 24c | Describe and explain any amendments to information provided at registration or in the protocol. | P4 L102-104 |
| Support | 25 | Describe sources of financial or non-financial support for the review, and the role of the funders or sponsors in the review. | P31 L445 |
| Competing interests | 26 | Declare any competing interests of review authors. | P31 L447 |
| Availability of data, code and other materials | 27 | Report which of the following are publicly available and where they can be found: template data collection forms; data extracted from included studies; data used for all analyses; analytic code; any other materials used in the review. | P8 L175 |

PRISMA checklist for abstracts:

| **Section and Topic** | **Item #** | **Checklist item** | Line number item is reported |
| --- | --- | --- | --- |
| **TITLE** | | |  |
| Title | 1 | Identify the report as a systematic review. | 18 |
| **BACKGROUND** | | |  |
| Objectives | 2 | Provide an explicit statement of the main objective(s) or question(s) the review addresses. | 18-20 |
| **METHODS** | | |  |
| Eligibility criteria | 3 | Specify the inclusion and exclusion criteria for the review. | 21-23 |
| Information sources | 4 | Specify the information sources (e.g. databases, registers) used to identify studies and the date when each was last searched. | 20+22 |
| Risk of bias | 5 | Specify the methods used to assess risk of bias in the included studies. | 24 |
| Synthesis of results | 6 | Specify the methods used to present and synthesise results. | 23+24 |
| **RESULTS** | | |  |
| Included studies | 7 | Give the total number of included studies and participants and summarise relevant characteristics of studies. | 24-27 |
| Synthesis of results | 8 | Present results for main outcomes, preferably indicating the number of included studies and participants for each. If meta-analysis was done, report the summary estimate and confidence/credible interval. If comparing groups, indicate the direction of the effect (i.e. which group is favoured). | 28-30 |
| **DISCUSSION** | | |  |
| Limitations of evidence | 9 | Provide a brief summary of the limitations of the evidence included in the review (e.g. study risk of bias, inconsistency and imprecision). | 32+33 |
| Interpretation | 10 | Provide a general interpretation of the results and important implications. | 30-32 |
| **OTHER** | | |  |
| Funding | 11 | Specify the primary source of funding for the review. | N/A |
| Registration | 12 | Provide the register name and registration number. | 20 |

**S2:** An example search string, for PsychArticles via ProQuest.

abstract((brief NEAR/3 (intervention* OR therap* OR interview* OR advice OR teach*)) OR (minimal NEAR/3 (intervention* OR therap* OR interview* OR advice OR teach*)) OR (early NEAR/3 (intervention* OR therap* OR interview* OR advice OR teach*)) OR (motivate* NEAR/3 (intervention* OR therap* OR interview* OR advice OR teach*)) OR (behavio?r NEAR/3 (intervention* OR therap* OR interview* OR advice OR teach*)) OR (educat* NEAR/3 (intervention* OR therap* OR interview* OR advice OR teach*)) OR counsel?ing OR advice OR "low intensity" OR screening OR cessation OR promot* OR prevention OR abstinence OR quit OR control) AND abstract(effect* OR "before after" OR clinical OR control* OR blind* OR "multi cent* studies" OR randomi* OR placebo* OR trial* OR group* OR allocate* OR mask* OR quantitative OR evaluat*) AND abstract("food assistance" OR "socioeconomic disadvantage" OR "girl guide*" OR scout* OR "university of the third age" OR U3A OR "lay health educator*" OR "lay health volunteer*" OR "lay health advisor*" OR "lay counsel?or*" OR ambassador* OR "food bank*" OR "food pantr*" OR "age UK" OR "red cross'" OR "soup kitchen*" OR "homeless shelter*" OR "community bank*" OR "non-governmental organi?ation" OR "non-governmental institution" OR "social enterprise*" OR "leisure trust" OR "third sector" OR voluntary OR cooperative OR charit* OR "food support" OR "free meals" OR "food insecur*" OR "food secur*" OR "non-profit" OR "not for profit" OR "Faith-based" OR "Faith-placed" OR "church-based" OR "church-placed" OR Church* OR Diocese* OR Faith OR Mosque* OR Parish OR Protestant OR Religio* OR synagogue OR temple OR congregation OR clergy OR "place of worship") AND abstract(smok* OR tobacco OR nicotine OR alcohol* OR drinking OR exercise OR "physical activity" OR sedentary OR nutrition OR diet OR food OR obesity OR weight OR housing OR employment OR financ*)

Limitations: Peer reviewed, English language, Human, Published up to February 2022.

**S3: Inclusion/exclusion table**

| **Domain** | **Included** | **Excluded** |
| --- | --- | --- |
| Participants/population | Adults (over 18) and studies with partially overlapping age ranges (e.g 15+) | Adolescents and children (under 18s) |
| Intervention | **All of the following:**   - Individual sessions under 30 minutes - One-to one - Discuss at least one of the following; housing, finance, physical activity, diet, smoking or alcohol. - Motivational interviewing, goal setting, action and coping planning (within the timescale) - Within a TSE setting OR delivered by someone from the TSE sector   **If delivered by volunteer from TSE setting:** by any medium e.g telephone or video call, in-person  **If not delivered by volunteer from TSE setting**: first session must be in-person, remaining sessions can be any medium e.g telephone or video call | **Any of the following:**   - Lasting more than 30 minutes - Group sessions - Do not discuss housing, finance, physical activity, diet, smoking or alcohol. - Interventions of changing the environment e.g nudging - Not within a TSE setting or delivered by someone from the TSE sector - Service providers from educational settings if not within the TSE sector - Studies where intervention was not delivered by a volunteer from the TSE sector, in which the first session was delivered remotely (e.g telephone, video call) |
| Comparator | Any or none | No exclusion criteria |
| Outcome | **1 of the following:**   - Self-report e.g food or exercise diary, smoking cessation/ abstinence - Objective measure of behaviour e.g accelerometer, exhaled carbon monoxide, observations, bank statement, employment status - Biological outcome of behaviour e.g glycaemic control, blood pressure, cholesterol | Mental states only e.g intentions, knowledge, self-efficacy |
| Setting | - Community settings (voluntary organisations, charities, social enterprises, cooperatives and mutuals) that are; outside of household or family, social benefit as the primary goal, independent of government - (For social enterprises and Cooperatives and mutuals) All of the following: Capital lock, less than 50% of surplus profit is distributed to stakeholders, at least 30% of employees/ beneficiaries posses a form of disadvantage e.g socioeconomic, disability. | - Educational settings (if service provider is not within the TSE sector) - Possesses one of the following: Group is within the household or family, social benefit is not the primary goal, takes orders/ led by the government - (For social enterprises and Cooperatives and mutuals) Any of the following: No capital lock, more than 50% of surplus profit is distributed to stakeholders, less than 30% of employees/ beneficiaries posses a form of disadvantage e.g socioeconomic, disability. |
| **Intervention and Context Overall** | **1 of the following**:  1) Delivered by someone within the TSE sector that is not from an educational setting e.g girl guides, charity volunteers, food bank operatives. Studies where a proportion of volunteers are non-educational TSE will be included.  2) Applied within a TSE setting that is not educational e.g food bank, soup kitchen, local knitting group, coffee morning | **Both of the following:**  1) Service provider is from educational settings or outside of the TSE sector e.g volunteer undergraduates, local council volunteers, healthcare professionals  2) Setting is educational or outside of the TSE sector e.g universities, within the home, GP practices, community pharmacies |
| Study Type | Quantitative: RCTs, before/after, non-randomised control trials, multi-centre trials, pilot trials | Qualitative: Interviews, focus groups, feasibility trials |
| Language | English language | Non-English language |
| Databases | Health Research Premium collection via ProQuest (Consumer Health Database, Health & Medical Collection, Healthcare Administration Database, MEDLINE®, Nursing & Allied Health, Database, Psychology Database, and Public Health Database), Sociological Abstracts, and ASSIA via Proquest. |  |
